# Supplementary material
Source: publisher site journal article supplement (http://www.kjim.org/upload/media/kjim-2021-427-suppl5.pdf)
Supplement: Supplementary file 1 [file kjim-2021-427-suppl5.pdf]

**Supplementary Table 5. Baseline characteristics of atypical chest pain group and typical chest pain group**

| Characteristic                        | Atypical (n = 1,190) | Typical (n = 8,679) | Odds ratio (95% CI) | p value |
|---------------------------------------|----------------------|---------------------|---------------------|---------|
| Age, yr                               | 68.1 ± 12.2          | 62.6 ± 12.3         | 5.522 (4.776–6.268) | < 0.001 |
| ≥ 75 yr                               | 364 (30.6)           | 1,478 (17.0)        | 2.147 (1.875–2.458) | < 0.001 |
| Women                                 | 398 (33.4)           | 2,025 (23.3)        | 1.651 (1.450–1.881) | < 0.001 |
| Killip class III or IV                | 364 (30.6)           | 833 (9.6)           | 4.151 (3.599–4.786) | < 0.001 |
| Hypertension                          | 674 (56.6)           | 4,213 (48.5)        | 1.385 (1.225–1.565) | < 0.001 |
| Diabetes mellitus                     | 409 (34.4)           | 2,193 (25.3)        | 1.549 (1.361–1.762) | < 0.001 |
| Dyslipidemia                          | 81 (6.8)             | 1,004 (11.6)        | 0.558 (0.441–0.706) | < 0.001 |
| Previous CVA                          | 124 (10.4)           | 484 (5.6)           | 1.970 (1.601–2.423) | < 0.001 |
| Smoking                               | 591 (49.7)           | 5,287 (60.9)        | 0.633 (0.561–0.715) | < 0.001 |
| Hypotension (SBP < 100 mmHg)          | 182 (15.3)           | 733 (8.4)           | 1.957 (1.643–2.332) | < 0.001 |
| Heart rate (> 100 beats/min)          | 238 (20.0)           | 726 (8.4)           | 2.739 (2.331–3.217) | < 0.001 |
| Renal dysfunction (Cr > 1.3 mg/dL)    | 312 (26.2)           | 778 (9.0)           | 3.609 (3.110–4.187) | < 0.001 |
| Obesity (BMI > 25 kg/m <sup>2</sup> ) | 292 (24.5)           | 3,123 (36.0)        | 0.598 (0.520–0.689) | < 0.001 |
| Previous HF                           | 32 (2.7)             | 70 (0.8)            | 3.399 (2.227–5.187) | < 0.001 |
| Family history of AMI                 | 48 (4.0)             | 604 (7.0)           | 0.562 (0.416–0.759) | < 0.001 |
| ST elevation MI                       | 424 (35.6)           | 4,765 (54.9)        | 0.455 (0.401–0.516) | < 0.001 |
| Atrial fibrillation                   | 95 (8.0)             | 380 (4.4)           | 1.895 (1.500–2.393) | < 0.001 |
| Total ischemic time                   | 65.0 ± 122.8         | 30.9 ± 74.8         | 34.19 (27.03–41.35) | < 0.001 |
| Total ischemic time > 12 hr           | 744 (62.5)           | 3,748 (43.2)        | 2.195 (1.937–2.486) | < 0.001 |

Values are presented as mean ± standard deviation or number (%).

CI, confidence interval; CVA, cerebrovascular accident; SBP, systolic blood pressure; Cr, creatinine; BMI, body mass index; HF, heart failure; AMI, acute myocardial infarction; MI, myocardial infarction.
